# Supplementary material
Source: PubMed Central journal article supplement (PMC8855291)
Supplement: mmc1.pdf [file mmc1.pdf]

# INDIVIDUAL CONFLICT OF INTEREST STATEMENT

## *American Association of Hip and Knee Surgeons*

(Adopted from the American Academy of Orthopaedic Surgeons disclosure statement)

The following form **must be filled out completely and submitted by each author (example, 6 authors, 6 forms).**  
**All items require a response. If there is no relevant disclosure for a given item, enter "None."**

COVID-19 Infection After Total Joint Arthroplasty is Associated with Increased Complications

---

### Manuscript Title

1. Royalties from a company or supplier (The following conflicts were disclosed)
  - **Zimmer Biomet**
  - **Smith and Nephew**
2. Speakers bureau/paid presentations for a company or supplier (The following conflicts were disclosed)  
**None**
- 3A. Paid employee for a company or supplier (The following conflicts were disclosed)  
**None**
- 3B. Paid consultant for a company or supplier (The following conflicts were disclosed)
  - **Zimmer Biomet**
  - **Smith and Nephew**
  - **Depuy Synthes**
- 3C. Unpaid consultants for a company or supplier (The following conflicts were disclosed)  
**None**
4. Stock or stock options in a company or supplier (The following conflicts were disclosed)
  - **Orthophor**
  - **Parvizi Surgical Innovations**
5. Research support from a company or supplier as a Principal Investigator (The following conflicts were disclosed)
  - **Smith and Nephew**
  - **Stryker**
  - **Zimmer Biomet**
6. Other financial or material support from a company or supplier (The following conflicts were disclosed)  
**None**
7. Royalties, financial or material support from publishers (The following conflicts were disclosed)
  - **SLACK**
  - **Wolter Kluwer**
  - **Smith and Nephew**
  - **Zimmer Biomet**
8. Medical/Orthopaedic publications editorial/governing board (The following conflicts were disclosed)
  - **Orthopedics Today**
9. Board member/committee appointments for a society (The following conflicts were disclosed)
  - **American Association of Hip and Knee Surgeons**
  - **Arthritis Foundation**
  - **DePuy Synthes**
  - **Hip Society**
  - **Knee Society**
  - **Mid America Orthopaedic Association**
  - **Orthopedics Today**

**Each author must sign AND print or type his/her name, date and submit a separate form**

In addition, one BLINDED Conflict of Interest form (no author names used) should be submitted per manuscript with all author disclosures.

**Craig Della Valle**

7/22/2021

Author Name (Print or Type)

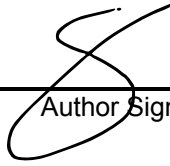A handwritten signature in black ink, appearing to be 'C. Della Valle', written over a horizontal line.

Author Signature

Date
